# Supplementary material for: BHMPS Inhibits Breast Cancer Migration and Invasion by Disrupting Rab27a-Mediated EGFR and Fibronectin Secretion
Source: MDPI journal article supplement (doi:10.3390/cancers14020373), 2022-01-12

Figure 1-A

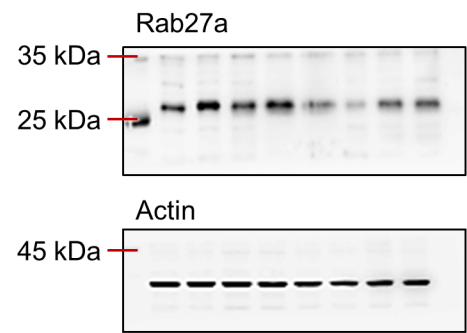

Figure 2-A

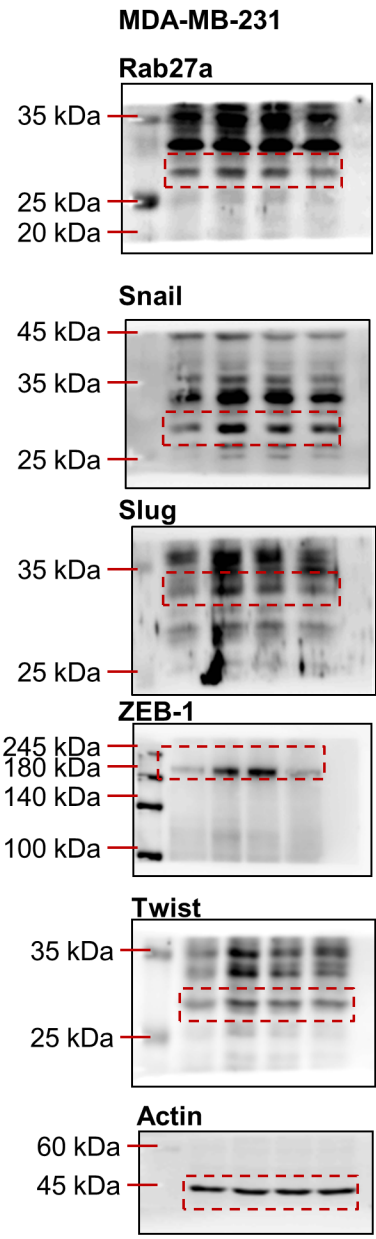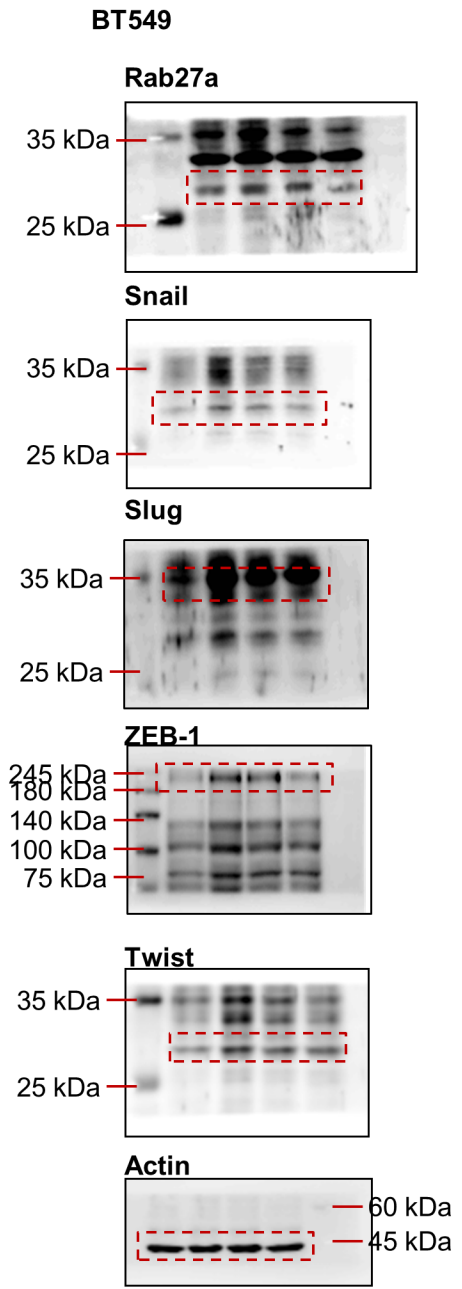

Figure 2-B

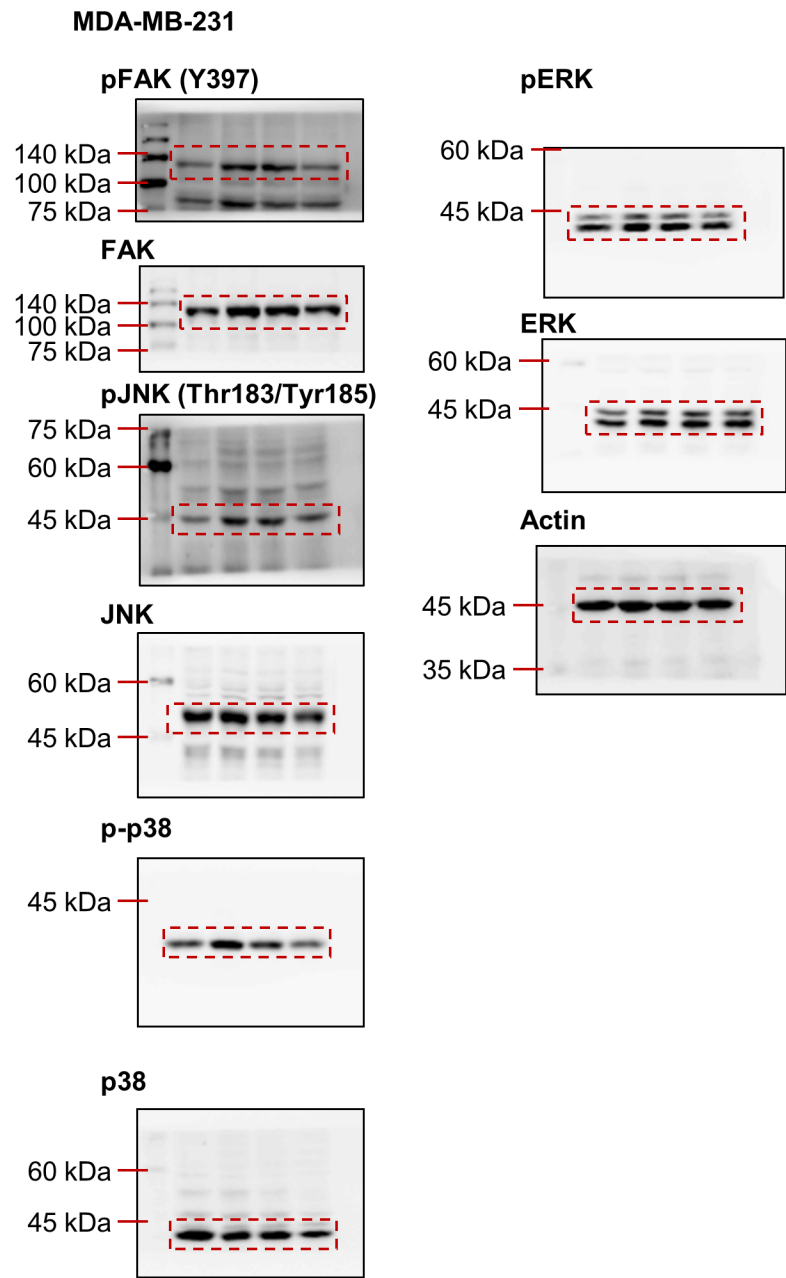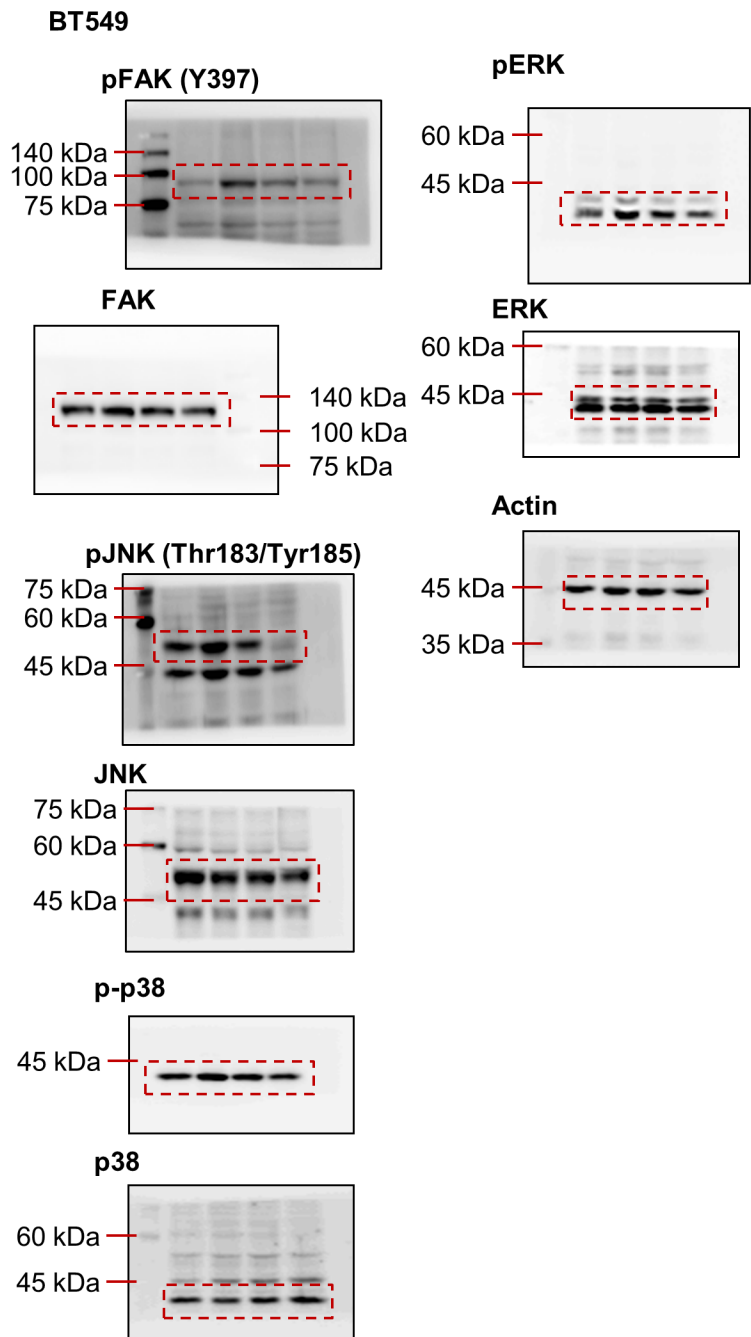

Figure 2-D

MDA-MB-231

BT549

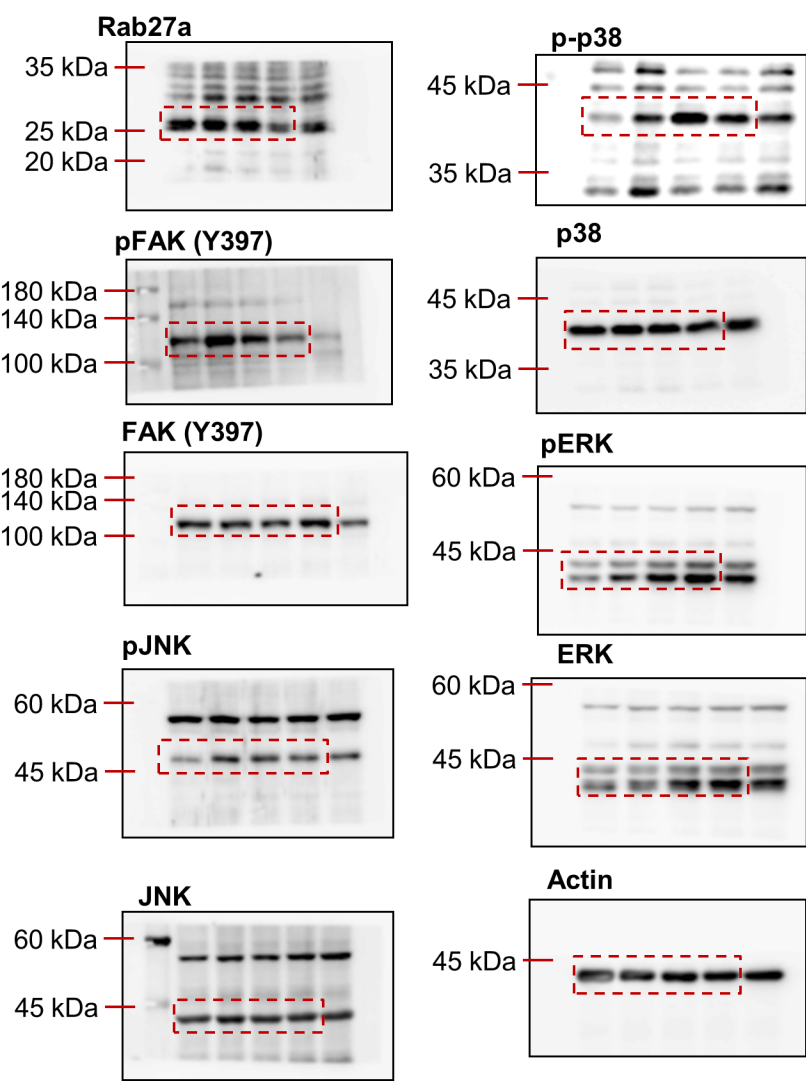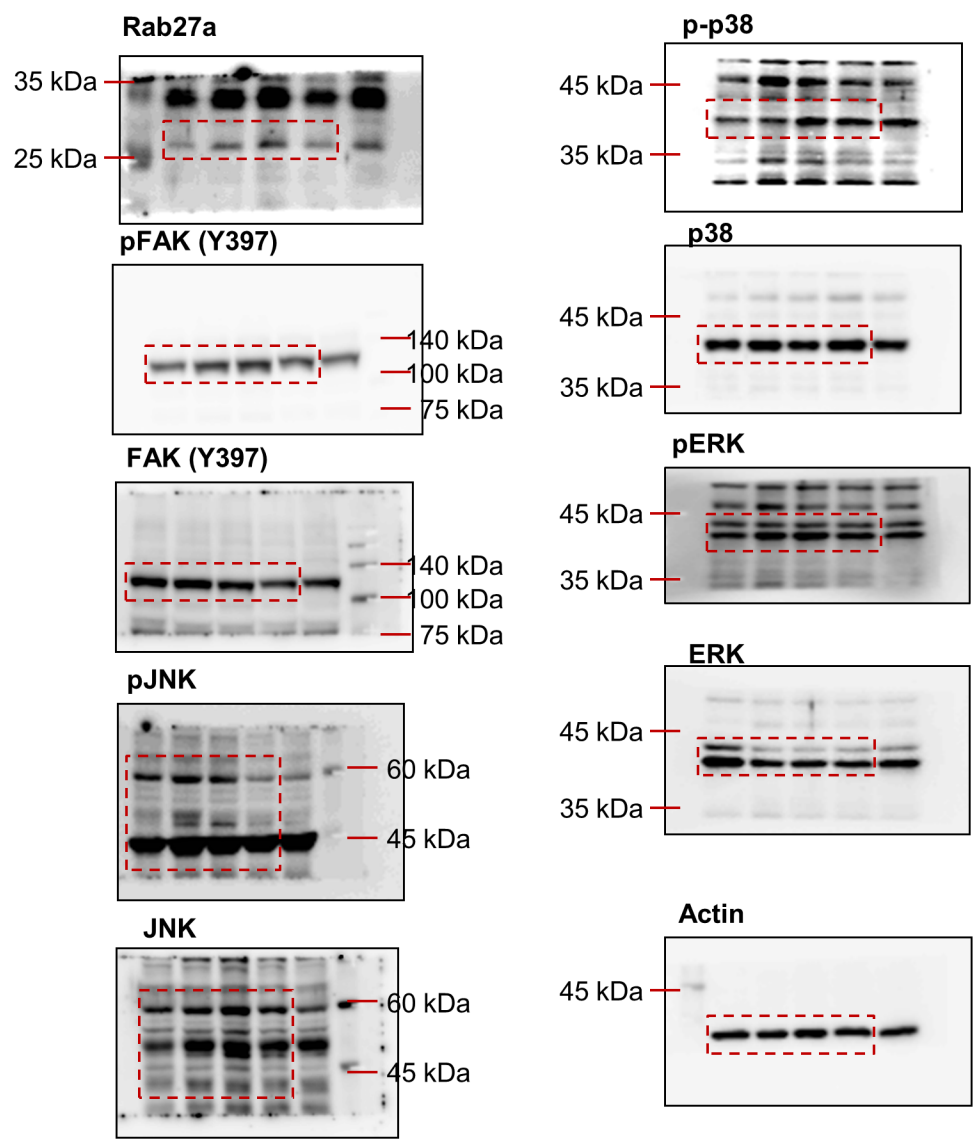

Figure 3-B

**BT474**

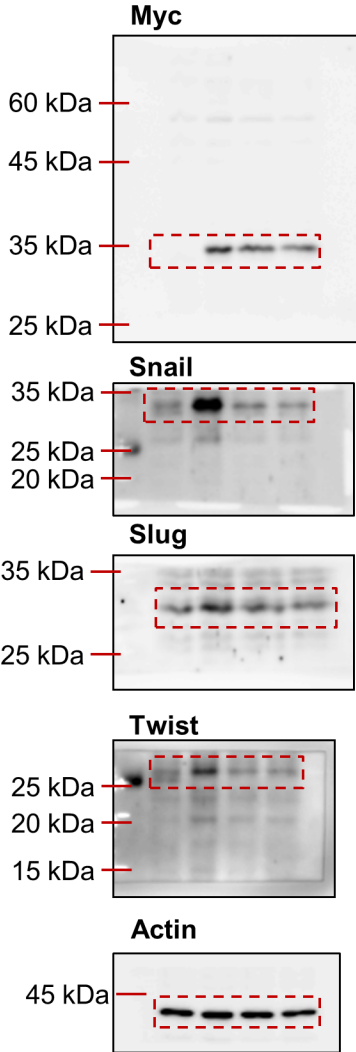

**MCF7**

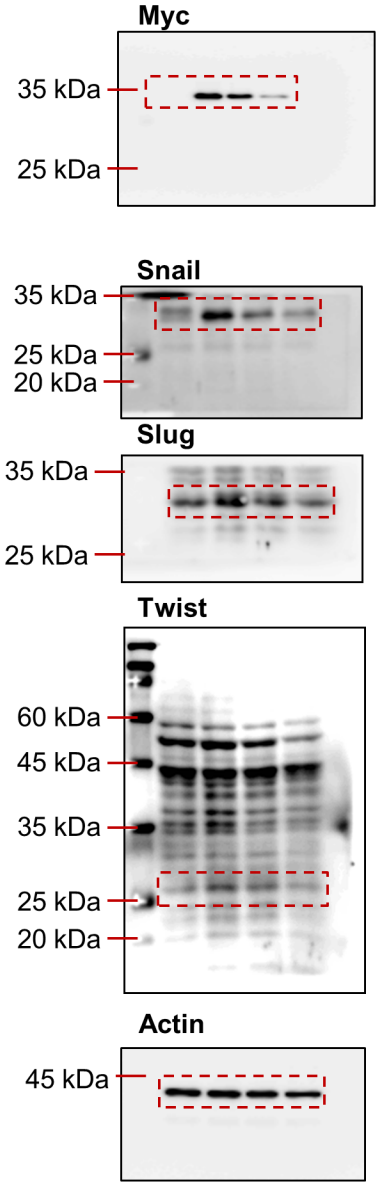

Figure 3-C

BT474

pFAK

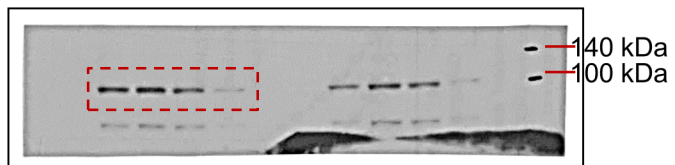

FAK

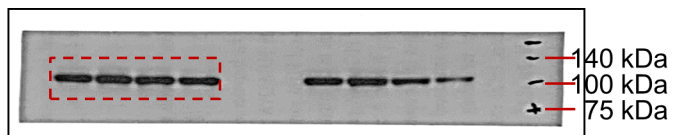

pJNK

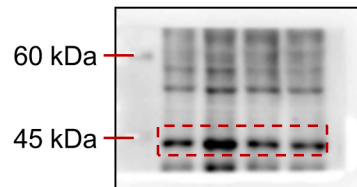

pERK

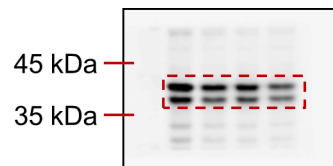

JNK

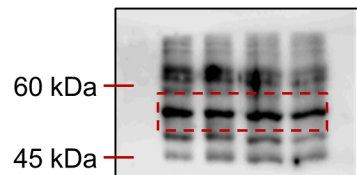

ERK

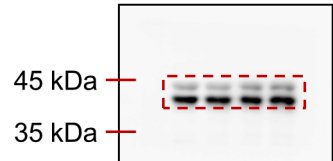

pp38

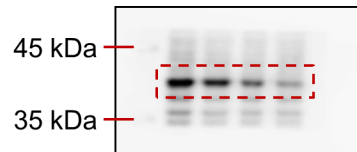

Actin

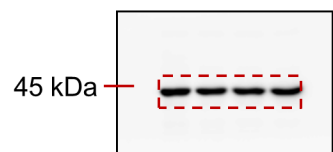

p38

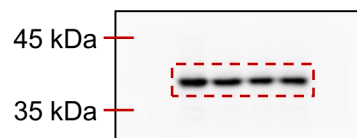

MCF7

pFAK

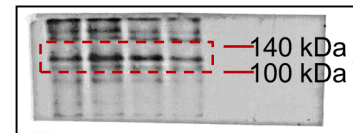

FAK

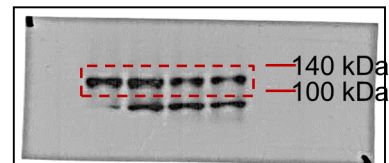

pJNK

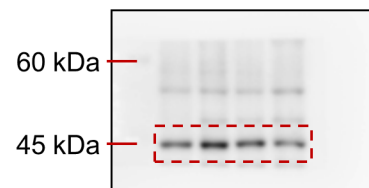

JNK

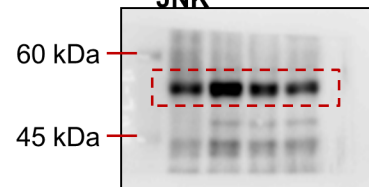

pp38

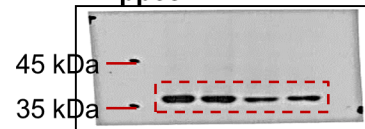

p38

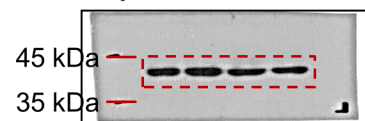

pERK

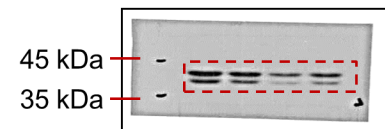

ERK

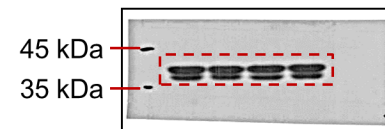

Actin

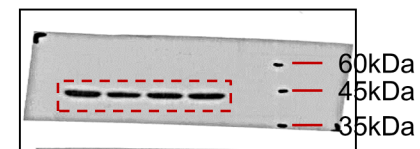

Figure 3-D

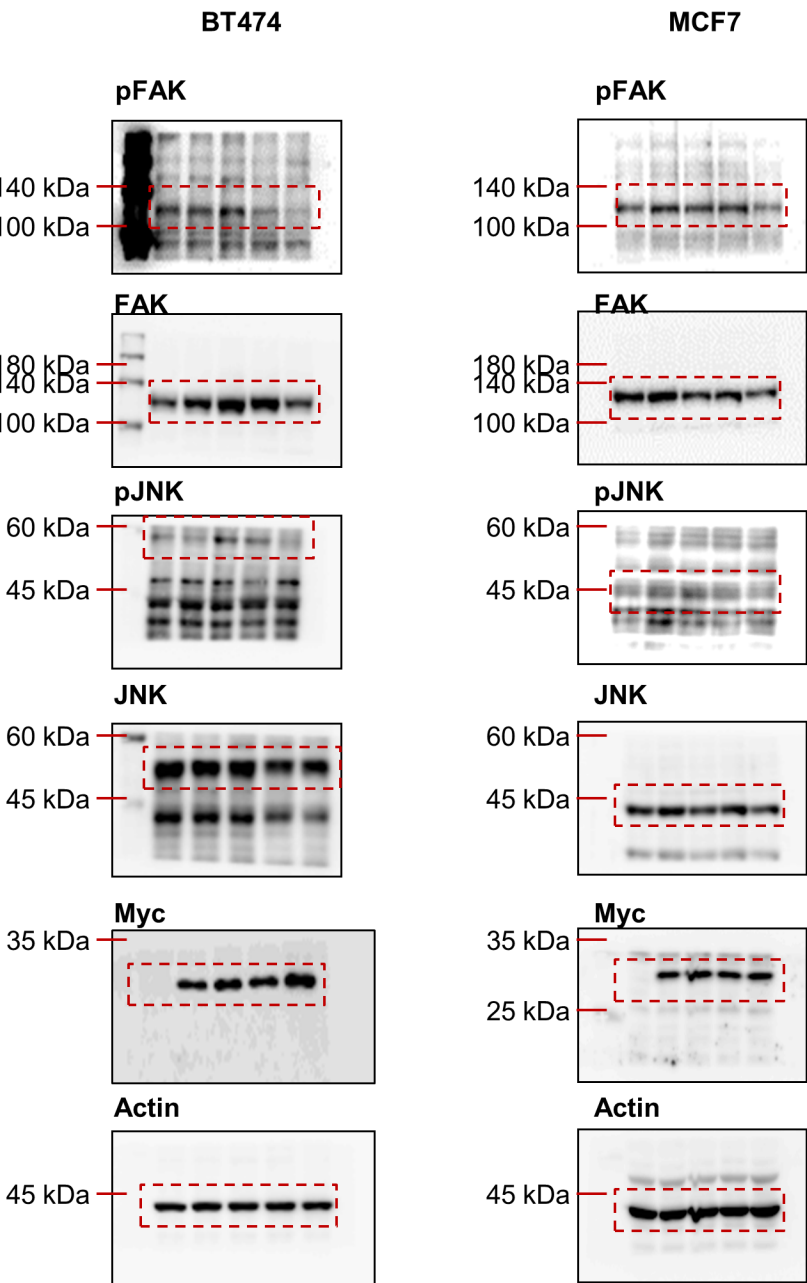

Figure 3-E

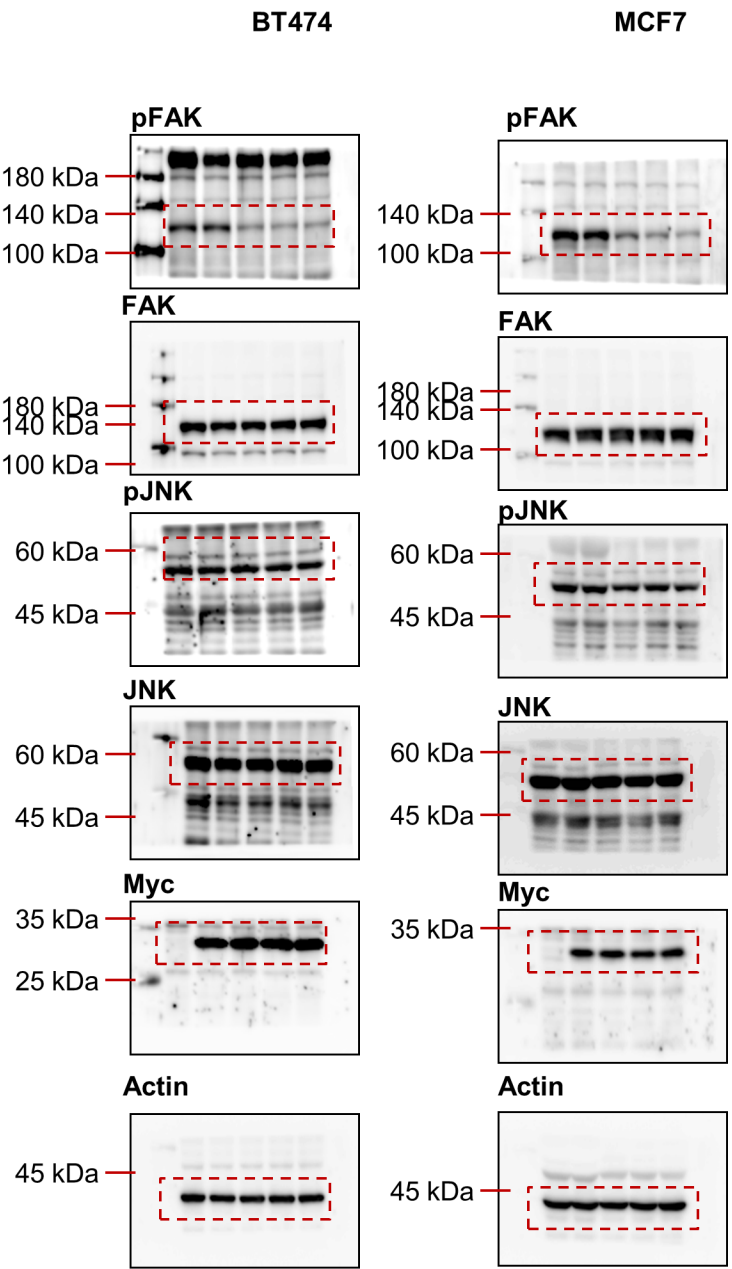

Figure 4-A

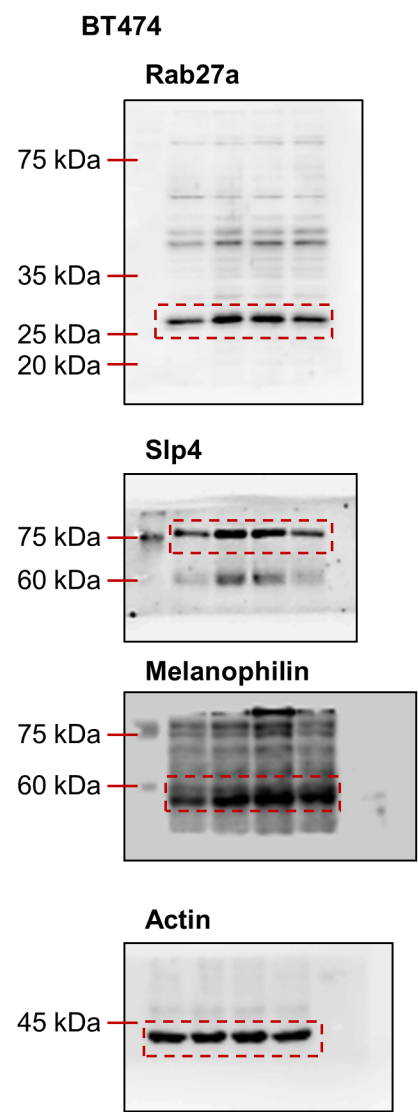

Figure 4-D

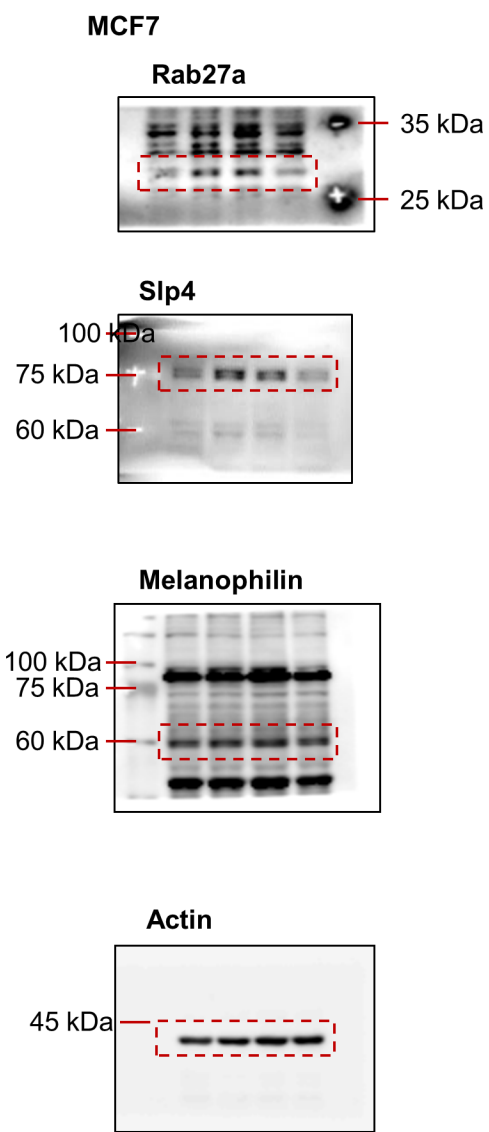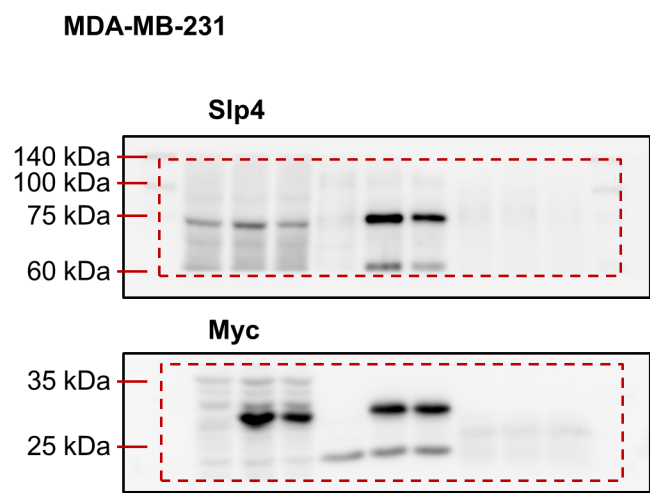



Figure 5-B

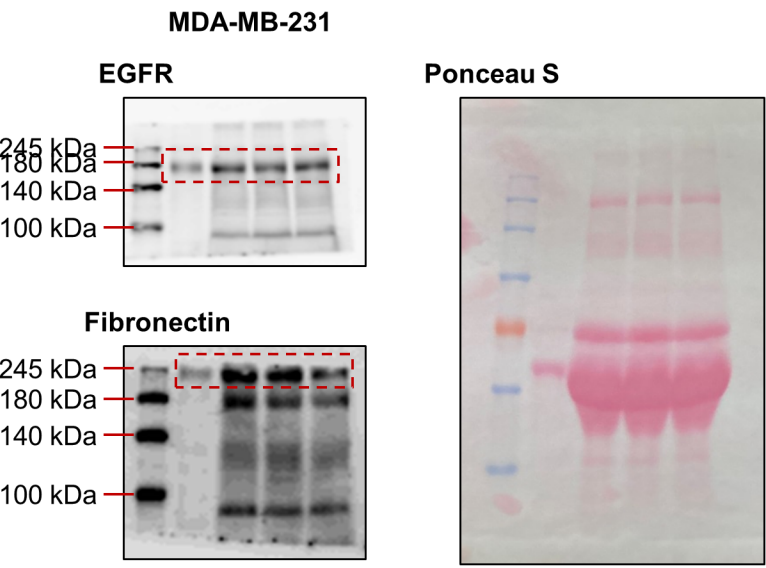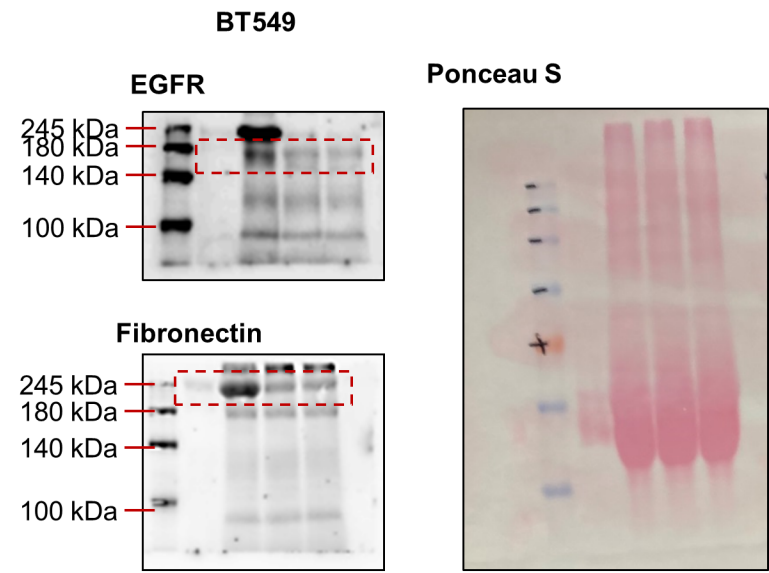

Supplement: s1 [file s1]
