# Supplementary material for: BHMPS Inhibits Breast Cancer Migration and Invasion by Disrupting Rab27a-Mediated EGFR and Fibronectin Secretion
Source: MDPI journal article supplement (doi:10.3390/cancers14020373), 2022-01-12
Supplement: s1 [file s1]

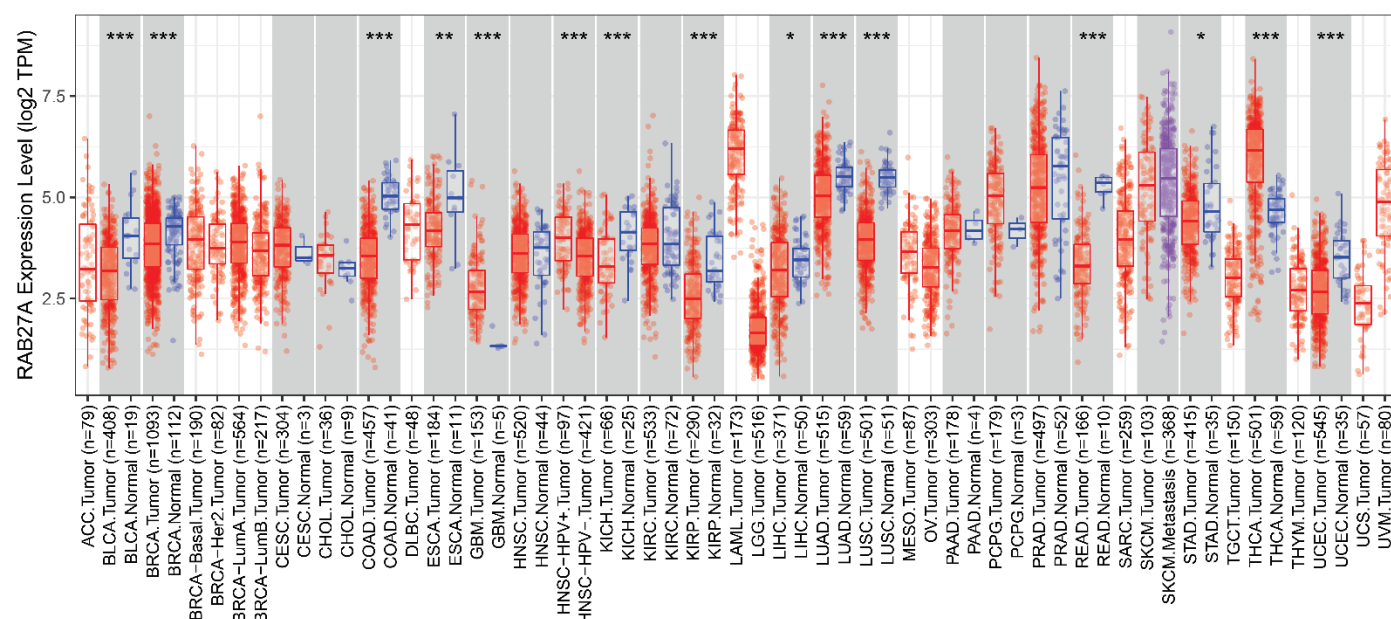

**Figure S1. The expressions of Rab27a in human tumors and adjacent normal tissues.** The differential expression of Rab27a between tumor and adjacent normal tissues was investigated in all TCGA tumors using Gene\_DE module of TIMER2.0 (<http://timer.comp-genomics.org/>). The distribution of Rab27A expression levels is shown using box plots. Statistical significance is annotated with the number of stars calculated by the Wilcoxon test (\*:  $p$ -value  $< 0.05$ ; \*\*:  $p$ -value  $< 0.01$ ; \*\*\*:  $p$ -value  $< 0.001$ ). If there is comparable normal tissue exist, it is displayed as gray columns.

**Table S1.** List of details for the antibodies and chemicals.

| material                                               | vendor                                       | catalog#   |
|--------------------------------------------------------|----------------------------------------------|------------|
| Minimal essential medium (MEM)                         | Welgene (Gyeongsangbuk-do, Korea)            | #LM007-07  |
| Dulbecco's modified Eagle's medium (DMEM)              | Welgene (Gyeongsangbuk-do, Korea)            | #LM001-05  |
| RPMI 1640 medium                                       | Welgene (Gyeongsangbuk-do, Korea)            | #LM011-01  |
| fetal bovine serum (FBS)                               | Welgene (Gyeongsangbuk-do, Korea)            | #S001-03   |
| penicillin-streptomycin solution                       | Welgene (Gyeongsangbuk-do, Korea)            | #LS202-02  |
| Dulbecco's phosphate-buffered saline                   | Welgene (Gyeongsangbuk-do, Korea)            | #LB001-02  |
| Matrigel                                               | BD Biosciences (San Jose, CA, USA)           | #354234    |
| Rab27a                                                 | Cell Signaling Technology (Beverly, MA, USA) | #69295     |
| snail family transcriptional repressor 1 (SNAI1/Snail) | Cell Signaling Technology (Beverly, MA, USA) | #3789      |
| snail family transcriptional repressor 2 (SNAI2/Slug)  | Cell Signaling Technology (Beverly, MA, USA) | #9585      |
| zinc finger E-box-binding homeobox 1 (Zeb1)            | Cell Signaling Technology (Beverly, MA, USA) | #3396      |
| focal adhesion kinase (FAK)                            | Cell Signaling Technology (Beverly, MA, USA) | #13009     |
| pFAK (Y397)                                            | Cell Signaling Technology (Beverly, MA, USA) | #8556      |
| c-Jun N-terminal kinases (JNK)                         | Cell Signaling Technology (Beverly, MA, USA) | #9252      |
| pJNK (T183/Y185)                                       | Cell Signaling Technology (Beverly, MA, USA) | #9255      |
| p38                                                    | Cell Signaling Technology (Beverly, MA, USA) | #9212      |
| pp38 (T180/Y182)                                       | Cell Signaling Technology (Beverly, MA, USA) | #4511      |
| ERK                                                    | Cell Signaling Technology (Beverly, MA, USA) | #4659      |
| pERK1/2 (T202/Y204)                                    | Cell Signaling Technology (Beverly, MA, USA) | #4370      |
| Myc-tag                                                | Cell Signaling Technology (Beverly, MA, USA) | #2278      |
| epidermal growth factor receptor (EGFR)                | Cell Signaling Technology (Beverly, MA, USA) | #4267      |
| synaptotagmin-like protein 4 (Slp4)                    | Santa Cruz Biotechnology (Dallas, TX, USA)   | #sc-374544 |
| fibronectin (FN)                                       | Santa Cruz Biotechnology (Dallas, TX, USA)   | #sc-8422   |
| twist family BHLH transcription factor 1 (Twist1)      | Abcam (Cambridge, MA, USA)                   | #ab50887   |
| melanophilin (Mlph)                                    | Abcam (Cambridge, MA, USA)                   | #ab112954  |

|                                                                                              |                                              |            |
|----------------------------------------------------------------------------------------------|----------------------------------------------|------------|
| $\beta$ -actin                                                                               | Sigma-Aldrich (St. Louis, MO, USA)           | #A5316     |
| cell lysis buffer (10 $\times$ )                                                             | Cell Signaling Technology (Beverly, MA, USA) | #9803      |
| Myc-Tag (71D10) rabbit monoclonal antibody                                                   | Cell Signaling Technology (Beverly, MA, USA) | #2278      |
| magnetic bead-conjugated Myc-Tag (9B11) mouse monoclonal antibody                            | Cell Signaling Technology (Beverly, MA, USA) | #5698      |
| horseradish peroxidase (HRP)-conjugated anti-mouse IgG light chain-specific (D3V2A) antibody | Cell Signaling Technology (Beverly, MA, USA) | 58802      |
| HRP-conjugated anti-rabbit IgG antibody                                                      | Cell Signaling Technology (Beverly, MA, USA) | #7074      |
| 3 $\times$ loading buffer                                                                    | Cell Signaling Technology (Beverly, MA, USA) | #7722      |
| rabbit Rab27a                                                                                | Cell Signaling Technology (Beverly, MA, USA) | #69295     |
| rabbit pFAK                                                                                  | Cell Signaling Technology (Beverly, MA, USA) | #8556      |
| rabbit Paxillin                                                                              | Cell Signaling Technology (Beverly, MA, USA) | #12065     |
| Mouse Rab27a                                                                                 | Santa Cruz Biotechnology (Dallas, TX, USA)   | #sc-136996 |
| mouse Slp4                                                                                   | Santa Cruz Biotechnology (Dallas, TX, USA)   | #sc-374544 |
| rabbit CD63                                                                                  | Santa Cruz Biotechnology (Dallas, TX, USA)   | #sc-15363  |
